# Supplementary material for: Effectiveness of Later-Stage Exercise Programs vs Usual Medical Care on Physical Function and Activity After Total Knee Replacement: A Randomized Clinical Trial
Source: PubMed Central journal article supplement (PMC6484600; doi:10.1001/jamanetworkopen.2019.0018), 2019-02-22
Supplement: jamanetwopen-2-e190018-s002.pdf [file jamanetwopen-2-e190018-s002.pdf]

## Supplementary Online Content

Piva SR, Schneider MJ, Moore CG, et al. Effectiveness of later-stage exercise programs vs usual medical care on physical function and activity after total knee replacement: a randomized clinical trial. *JAMA Netw Open*. 2019;2(2):e190018. doi:10.1001/jamanetworkopen.2019.0018

**eFigure.** Graphs of Individual Performance-Based Tests Over Time

**eTable 1.** Performance-Based Tests Over Time in Study Arms

**eTable 2.** Baseline Values of Variables Tested as Potential Moderators

**eTable 3.** Mean Values of Physical Function Measured by WOMAC-PF and Number of Participants at Each Time Point for the Levels of Potential Moderators

**eTable 4.** Test of Heterogeneity of Treatment Effects at Each Time Point

This supplementary material has been provided by the authors to give readers additional information about their work.

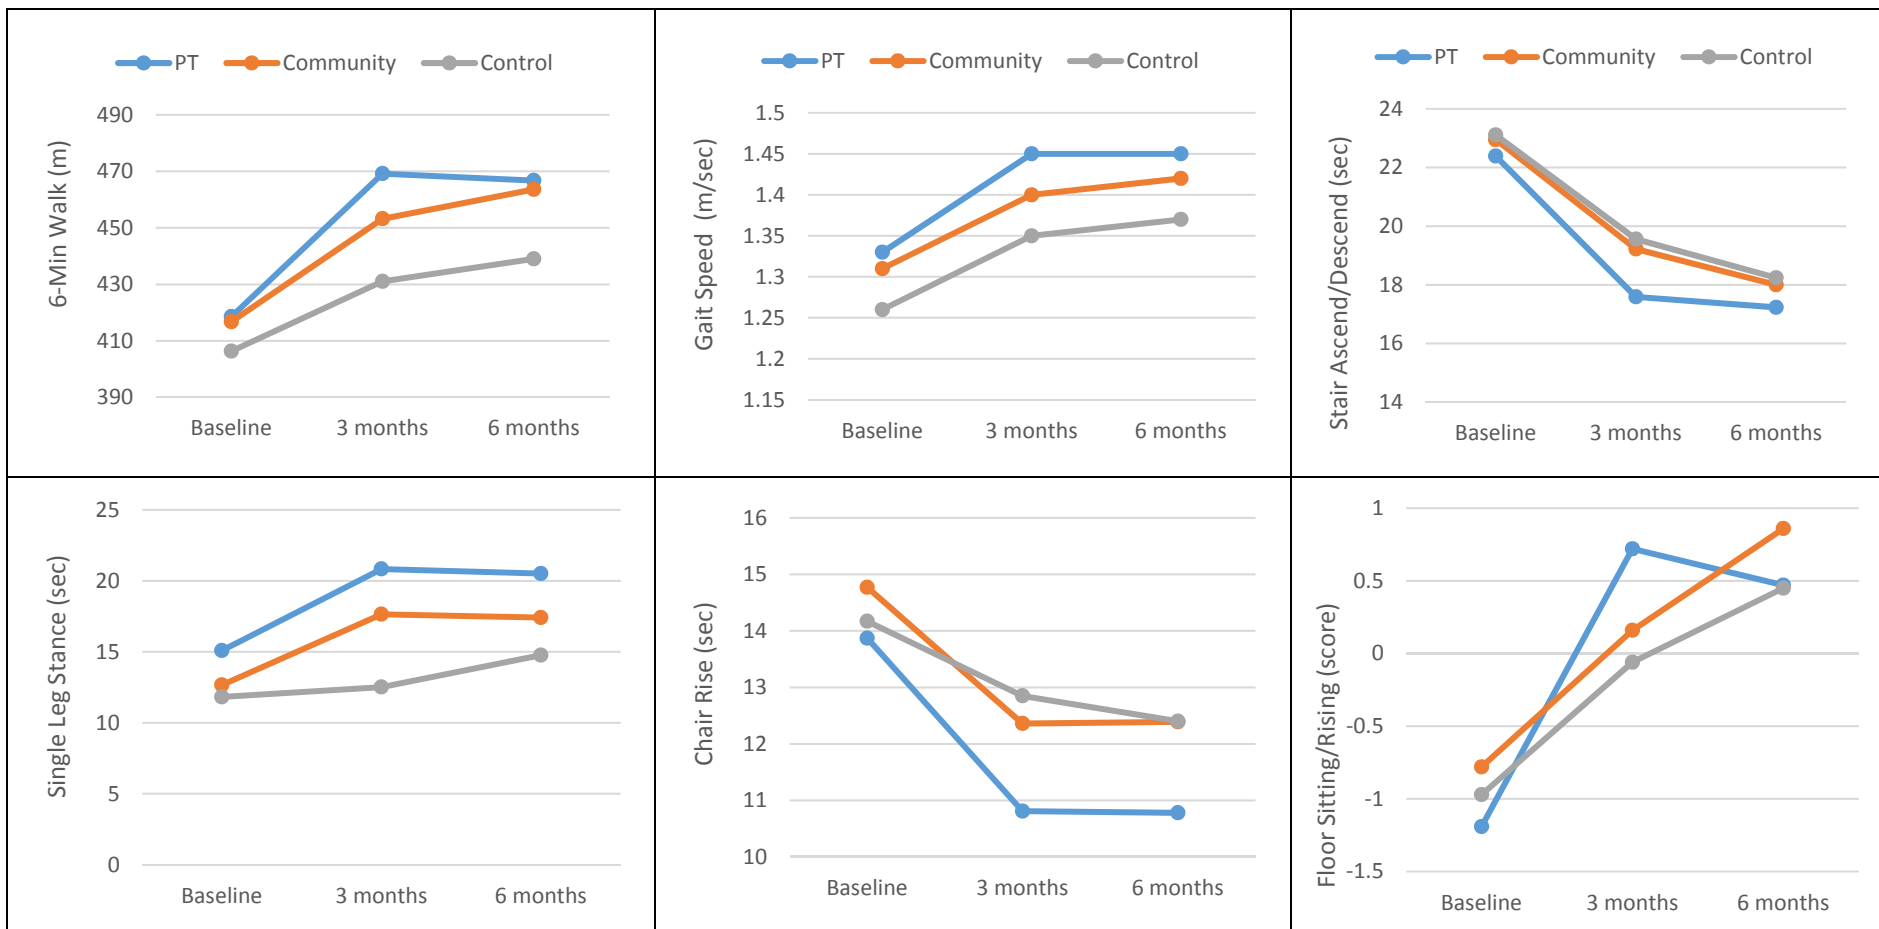

**eFigure.** Graphs of Individual Performance-Based Tests Over Time

Abbreviation: PT, Physical Therapy.

Data are the means for each performance-based test for baseline, 3 months, and 6 months. 6 minute walk test assesses the distance covered while walking during 6 min, gait speed is calculated during walking over 40-meters, stair test measures the time to go up and down a set of 11 stairs, single leg stance test records the time balancing on one leg while keeping the hands on the hips, chair rise test measures time during 5 repetitions of rising to a full upright position and sitting back down in the chair, and sitting/rising test assesses the ability of participants to sit and rise from the floor.

**eTable 1. Performance-Based Tests Over Time in Study Arms**

|                                        | Baseline |             | 3 months |             | 6 months |             | Δ Ba<br>to 3-mo | Δ%  | Δ Ba<br>to 6-mo | Δ%  |
|----------------------------------------|----------|-------------|----------|-------------|----------|-------------|-----------------|-----|-----------------|-----|
|                                        | N        | Mean (SD)   | N        | Mean (SD)   | N        | Mean (SD)   |                 |     |                 |     |
| Six-minute Walk Test (meters)          |          |             |          |             |          |             |                 |     |                 |     |
| Physical Therapy                       | 96       | 419 (97)    | 88       | 469 (100)   | 83       | 467 (116)   | 50              | 12  | 48              | 12  |
| Community                              | 96       | 417 (105)   | 86       | 453 (104)   | 76       | 464 (120)   | 36              | 9   | 47              | 11  |
| Control                                | 48       | 406 (91)    | 43       | 431 (82)    | 40       | 439 (98)    | 25              | 6   | 33              | 8   |
| Gait Speed (meters/sec)                |          |             |          |             |          |             |                 |     |                 |     |
| Physical Therapy                       | 96       | 1.33 (0.27) | 89       | 1.45 (0.28) | 83       | 1.45 (0.28) | 0.12            | 9   | 0.12            | 9   |
| Community                              | 96       | 1.31 (0.28) | 86       | 1.40 (0.29) | 76       | 1.42 (0.31) | 0.09            | 7   | 0.11            | 8   |
| Control                                | 48       | 1.26 (0.27) | 44       | 1.35 (0.25) | 40       | 1.37 (0.27) | 0.09            | 7   | 0.11            | 9   |
| Stair Ascend/Descend Test (sec)        |          |             |          |             |          |             |                 |     |                 |     |
| Physical Therapy                       | 96       | 22.4 (10.8) | 89       | 17.6 (7.0)  | 83       | 17.2 (6.9)  | -4.8            | -21 | -5.2            | -23 |
| Community                              | 96       | 23.0 (10.8) | 85       | 19.2 (8.5)  | 75       | 18.0 (8.4)  | -3.8            | -17 | -5              | -22 |
| Control                                | 48       | 23.1 (9.2)  | 44       | 19.6 (9.7)  | 40       | 18.2 (8.4)  | -3.5            | -15 | -4.9            | -21 |
| Single Leg Stance Test (sec)           |          |             |          |             |          |             |                 |     |                 |     |
| Physical Therapy                       | 96       | 15.1 (17.5) | 89       | 20.8 (19.5) | 83       | 20.5 (19.4) | 5.7             | 38  | 5.4             | 36  |
| Community                              | 96       | 12.7 (14.2) | 87       | 17.6 (18.8) | 76       | 17.4 (17.0) | 4.9             | 39  | 4.7             | 37  |
| Control                                | 48       | 11.8 (12.8) | 44       | 12.5 (13.4) | 40       | 14.8 (16.9) | 0.7             | 6   | 3               | 25  |
| Chair Rise Test (sec)                  |          |             |          |             |          |             |                 |     |                 |     |
| Physical Therapy                       | 95       | 13.9 (5.4)  | 89       | 10.8 (3.0)  | 83       | 10.8 (2.9)  | -3.1            | -22 | -3.1            | -22 |
| Community                              | 94       | 14.8 (5.2)  | 85       | 12.4 (3.6)  | 75       | 12.4 (5.4)  | -2.4            | -16 | -2.4            | -16 |
| Control                                | 46       | 14.2 (4.1)  | 43       | 12.9 (3.2)  | 39       | 12.4 (4.1)  | -1.3            | -9  | -1.8            | -13 |
| Sitting/Rising Test Score <sup>a</sup> |          |             |          |             |          |             |                 |     |                 |     |
| Physical Therapy                       | 75       | -1.2 (4.0)  | 72       | 0.72 (3.5)  | 69       | 0.5 (5.6)   | 1.92            | 160 | 1.7             | 142 |
| Community                              | 69       | -0.78 (4.0) | 67       | 0.16 (4.3)  | 60       | 0.86 (4.2)  | 0.94            | 121 | 1.64            | 210 |
| Control                                | 36       | -0.97 (3.9) | 34       | -0.06 (4.7) | 31       | 0.45 (4.1)  | 0.91            | 94  | 1.42            | 146 |

Abbreviations: Ba, Baseline; mo, months; Δ, change; Δ%, percentage change  
<sup>a</sup> Negative scores in sitting/rising test represents worse physical function

| <b>eTable 2. Baseline Values of Variables Tested as Potential Moderators</b>                                                                                                                                                                                                                                                                                                                                              |                                    |                             |                           |
|---------------------------------------------------------------------------------------------------------------------------------------------------------------------------------------------------------------------------------------------------------------------------------------------------------------------------------------------------------------------------------------------------------------------------|------------------------------------|-----------------------------|---------------------------|
| <b>Variables <sup>a</sup></b>                                                                                                                                                                                                                                                                                                                                                                                             | <b>Physical Therapy<br/>(n=96)</b> | <b>Community<br/>(n=96)</b> | <b>Control<br/>(n=48)</b> |
| Age – yr                                                                                                                                                                                                                                                                                                                                                                                                                  | 69 ± 6                             | 70 ± 7                      | 70 ± 7                    |
| Female – no. (%)                                                                                                                                                                                                                                                                                                                                                                                                          | 59 (62)                            | 58 (60)                     | 31 (65)                   |
| Body-mass index (kg/m <sup>2</sup> )                                                                                                                                                                                                                                                                                                                                                                                      | 30.8 ± 5.3                         | 31.1 ± 6.3                  | 31.5 ± 5.1                |
| Knee flexion surgical knee (degrees)                                                                                                                                                                                                                                                                                                                                                                                      | 124 ± 11                           | 123 ± 11                    | 124 ± 10                  |
| Knee extension surgical knee (degrees)                                                                                                                                                                                                                                                                                                                                                                                    | -1.2 ± 5.8                         | -0.7 ± 4.4                  | -2.1 ± 5.2                |
| Knee flexion non-surgical knee (degrees)                                                                                                                                                                                                                                                                                                                                                                                  | 131 ± 12                           | 130 ± 13                    | 131 ± 11                  |
| Knee extension non-surgical knee (degrees)                                                                                                                                                                                                                                                                                                                                                                                | 1.6 ± 5.1                          | 1.5 ± 4.5                   | 0.7 ± 4.9                 |
| Depression <sup>b</sup>                                                                                                                                                                                                                                                                                                                                                                                                   | 8.8 ± 3.0                          | 8.0 ± 2.8                   | 7.6 ± 2.1                 |
| Anxiety <sup>c</sup>                                                                                                                                                                                                                                                                                                                                                                                                      | 4.0 ± 4.3                          | 3.3 ± 3.3                   | 2.8 ± 3.0                 |
| Fear of movement <sup>d</sup>                                                                                                                                                                                                                                                                                                                                                                                             | 34.0 ± 5.1                         | 33.6 ± 6.4                  | 33.7 ± 5.8                |
| Self-Efficacy pain <sup>e</sup>                                                                                                                                                                                                                                                                                                                                                                                           | 76.8 ± 15.4                        | 75.1 ± 16.0                 | 74.1 ± 18.8               |
| Self-efficacy function                                                                                                                                                                                                                                                                                                                                                                                                    | 83.3 ± 13.2                        | 82.6 ± 12.5                 | 82.4 ± 14.1               |
| Self-efficacy symptom                                                                                                                                                                                                                                                                                                                                                                                                     | 82.9 ± 12.4                        | 80.9 ± 14.7                 | 79.1 ± 16.4               |
| <p>a Data presented as mean ± SD, unless otherwise specified.<br/> b Depressive symptom assessed by the Center for Epidemiologic Studies Short Depression Scale.<sup>30</sup><br/> c Anxiety measured using the Beck Anxiety Index.<sup>31</sup><br/> d Fear of movement measured by the Tampa Scale for Kinesiophobia.<sup>66</sup><br/> e Self-efficacy measured by the Arthritis Self Efficacy Scale.<sup>33</sup></p> |                                    |                             |                           |

**eTable 3.** Mean Values of Physical Function Measured by WOMAC-PF and Number of Participants at Each Time Point for the Levels of Potential Moderators

| Potential Moderators       | Time Point <sup>a</sup> | Physical Therapy |       | Community |       | Control |       |
|----------------------------|-------------------------|------------------|-------|-----------|-------|---------|-------|
|                            |                         | n                | Mean  | n         | Mean  | n       | Mean  |
| Age ≤74                    | 0                       | 76               | 21.09 | 73        | 20.26 | 34      | 20.88 |
|                            | 3                       | 71               | 10.11 | 65        | 11.62 | 31      | 12.68 |
|                            | 6                       | 70               | 9.51  | 66        | 10.68 | 31      | 10.97 |
| Age >74                    | 0                       | 20               | 20.05 | 23        | 21    | 14      | 18.57 |
|                            | 3                       | 19               | 10.26 | 22        | 14.05 | 13      | 9.92  |
|                            | 6                       | 19               | 10.63 | 22        | 11.14 | 14      | 13.57 |
| Male                       | 0                       | 37               | 19.19 | 38        | 18.92 | 17      | 18.47 |
|                            | 3                       | 34               | 10.68 | 34        | 10.97 | 16      | 10.75 |
|                            | 6                       | 34               | 9.53  | 34        | 9.09  | 17      | 11    |
| Female                     | 0                       | 59               | 21.93 | 58        | 21.43 | 31      | 21.16 |
|                            | 3                       | 56               | 9.82  | 53        | 13.04 | 28      | 12.5  |
|                            | 6                       | 55               | 9.89  | 54        | 11.87 | 28      | 12.25 |
| BMI<30                     | 0                       | 46               | 18.02 | 46        | 20    | 20      | 19.1  |
|                            | 3                       | 45               | 8.4   | 42        | 9.69  | 19      | 10.53 |
|                            | 6                       | 44               | 6.73  | 43        | 8.58  | 19      | 12.11 |
| BMI≥30                     | 0                       | 50               | 23.5  | 50        | 20.84 | 28      | 21    |
|                            | 3                       | 45               | 11.89 | 45        | 14.6  | 25      | 12.88 |
|                            | 6                       | 45               | 12.71 | 45        | 12.91 | 26      | 11.54 |
| WOMAC-PF < 20              | 0                       | 46               | 14.22 | 47        | 14.55 | 26      | 14.23 |
|                            | 3                       | 43               | 7.37  | 42        | 10.21 | 24      | 8.58  |
|                            | 6                       | 43               | 6.86  | 43        | 8.37  | 24      | 9.17  |
| WOMAC-PF ≥ 20              | 0                       | 50               | 27    | 49        | 26.08 | 22      | 27.27 |
|                            | 3                       | 47               | 12.68 | 45        | 14.11 | 20      | 15.8  |
|                            | 6                       | 46               | 12.46 | 45        | 13.11 | 21      | 14.76 |
| Surgical knee flexion ≤120 | 0                       | 30               | 25.57 | 37        | 22.03 | 19      | 20.58 |
|                            | 3                       | 27               | 13.59 | 34        | 14.47 | 19      | 12.05 |
|                            | 6                       | 29               | 14.55 | 33        | 13.58 | 19      | 11.11 |
| Surgical knee flexion >120 | 0                       | 66               | 18.74 | 59        | 19.44 | 29      | 19.97 |
|                            | 3                       | 63               | 8.67  | 53        | 10.79 | 25      | 11.72 |
|                            | 6                       | 60               | 7.43  | 55        | 9.13  | 26      | 12.27 |

|                                        |   |    |       |    |       |    |       |
|----------------------------------------|---|----|-------|----|-------|----|-------|
| Surgical knee extension <0 degrees     | 0 | 56 | 21.77 | 54 | 20.37 | 35 | 20.34 |
|                                        | 3 | 52 | 11.75 | 51 | 13    | 33 | 12.33 |
|                                        | 6 | 51 | 10.63 | 51 | 10.65 | 34 | 12.79 |
| Surgical knee extension ≥0 degrees     | 0 | 40 | 19.63 | 42 | 20.52 | 13 | 19.85 |
|                                        | 3 | 38 | 7.95  | 36 | 11.14 | 11 | 10.45 |
|                                        | 6 | 38 | 8.58  | 37 | 11    | 11 | 8.64  |
| Non-surgical knee flexion ≤120         | 0 | 20 | 25.2  | 22 | 23.23 | 8  | 21.75 |
|                                        | 3 | 17 | 13.12 | 20 | 15    | 8  | 15.63 |
|                                        | 6 | 18 | 12.83 | 20 | 15.05 | 8  | 12.13 |
| Non-surgical knee flexion >120         | 0 | 76 | 19.74 | 74 | 19.61 | 40 | 19.9  |
|                                        | 3 | 73 | 9.45  | 67 | 11.4  | 36 | 11.03 |
|                                        | 6 | 71 | 8.97  | 68 | 9.54  | 37 | 11.7  |
| Non-surgical knee extension <0 degrees | 0 | 35 | 22.09 | 33 | 22.06 | 22 | 22.59 |
|                                        | 3 | 33 | 13.7  | 32 | 15.72 | 21 | 13.81 |
|                                        | 6 | 32 | 11.91 | 32 | 12.53 | 21 | 13.24 |
| Non-surgical knee extension ≥0 degrees | 0 | 61 | 20.18 | 63 | 19.59 | 26 | 18.19 |
|                                        | 3 | 57 | 8.09  | 55 | 10.2  | 23 | 10.09 |
|                                        | 6 | 57 | 8.54  | 56 | 9.8   | 24 | 10.5  |
| No anxiety or depression <sup>b</sup>  | 0 | 58 | 19.81 | 67 | 19.67 | 34 | 20.06 |
|                                        | 3 | 54 | 9.57  | 60 | 10.2  | 32 | 12.41 |
|                                        | 6 | 53 | 9.08  | 63 | 9.03  | 32 | 11.88 |
| Anxiety and/or depression              | 0 | 38 | 22.5  | 29 | 22.21 | 14 | 20.57 |
|                                        | 3 | 36 | 11    | 27 | 16.74 | 12 | 10.42 |
|                                        | 6 | 36 | 10.75 | 25 | 15.24 | 13 | 11.54 |
| Low fear of movement <sup>c</sup>      | 0 | 41 | 19.93 | 47 | 20.26 | 25 | 19.44 |
|                                        | 3 | 38 | 8.74  | 43 | 11.7  | 24 | 10.04 |
|                                        | 6 | 40 | 8.43  | 44 | 9.73  | 24 | 10.17 |
| High fear of movement                  | 0 | 55 | 21.58 | 49 | 20.61 | 23 | 21.04 |
|                                        | 3 | 52 | 11.17 | 44 | 12.75 | 20 | 14.05 |
|                                        | 6 | 49 | 10.84 | 44 | 11.86 | 21 | 13.62 |
| Low pain self-efficacy <sup>d</sup>    | 0 | 46 | 21.87 | 44 | 21.64 | 25 | 22.08 |
|                                        | 3 | 44 | 11.5  | 41 | 14    | 21 | 11.9  |
|                                        | 6 | 42 | 9.98  | 41 | 12.76 | 22 | 14    |
| High pain self-efficacy                | 0 | 50 | 19.96 | 52 | 19.42 | 23 | 18.17 |
|                                        | 3 | 46 | 8.85  | 46 | 10.65 | 23 | 11.83 |

|                             |   |    |       |    |       |    |       |
|-----------------------------|---|----|-------|----|-------|----|-------|
|                             | 6 | 47 | 9.55  | 47 | 9.09  | 23 | 9.65  |
| Low function self-efficacy  | 0 | 42 | 23.93 | 49 | 23.08 | 27 | 22.93 |
|                             | 3 | 41 | 12.12 | 43 | 15.37 | 24 | 14.92 |
|                             | 6 | 38 | 12.92 | 45 | 14.58 | 25 | 14.12 |
| High function self-efficacy | 0 | 54 | 18.5  | 47 | 17.68 | 21 | 16.71 |
|                             | 3 | 49 | 8.49  | 44 | 9.16  | 20 | 8.2   |
|                             | 6 | 51 | 7.39  | 43 | 6.84  | 20 | 8.85  |
| Low symptom self-efficacy   | 0 | 41 | 22.54 | 45 | 20.67 | 22 | 21.27 |
|                             | 3 | 41 | 11.44 | 41 | 14.17 | 20 | 10.2  |
|                             | 6 | 38 | 10.16 | 42 | 12.86 | 21 | 12.1  |
| High symptom self-efficacy  | 0 | 55 | 19.64 | 51 | 20.24 | 26 | 19.31 |
|                             | 3 | 49 | 9.06  | 46 | 10.5  | 24 | 13.25 |
|                             | 6 | 51 | 9.45  | 46 | 8.91  | 24 | 11.5  |

Abbreviation: WOMAC-PF, Western Ontario and McMaster Universities Osteoarthritis Index Physical-function Scale.

a Time points 0, 3, and 6 correspond to baseline, 3 and 6 months follow-ups.

b Anxiety assessed by Beck Anxiety Index (anxiety defined by values  $\geq 8$ ).<sup>31</sup> Depressive symptom assessed by the Center for Epidemiologic Studies Short Depression Scale (depression defined by values  $\geq 10$ ).<sup>30</sup> Due to low prevalence, individuals were classified as having either anxiety, depression, or both.

c Fear of movement measured by the Tampa Scale for Kinesiophobia (medians were used as cut-offs).<sup>66</sup>

d Self-efficacy measured by the Arthritis Self Efficacy Scale (medians were used as cut-offs).<sup>33</sup>

| <b>eTable 4. Test of Heterogeneity of Treatment Effects at Each Time Point</b> |                         |                                      |                             |                               |
|--------------------------------------------------------------------------------|-------------------------|--------------------------------------|-----------------------------|-------------------------------|
| Potential Moderators                                                           | Time Point <sup>a</sup> | Physical Therapy vs Control          | Community vs Control        | Physical Therapy vs Community |
|                                                                                |                         | Mean Difference (95% CI) in WOMAC-PF |                             |                               |
| Age ≤74                                                                        | 3                       | -2.10 (-4.75; 0.56)                  | -0.20 (-2.89; 2.49)         | -1.90 (-4.00; 0.21)           |
| Age >74                                                                        |                         | -1.87 (-6.29; 2.55)                  | 1.09 (-3.21; 5.38)          | -2.95 (-6.82; 0.92)           |
| Age ≤74                                                                        | 6                       | -1.17 (-3.89; 1.55)                  | 0.61 (-2.14; 3.36)          | -1.78 (-3.93; 0.37)           |
| Age >74                                                                        |                         | -3.86 (-8.32; 0.60)                  | -4.13 (-8.46; 0.20)         | 0.27 (-3.69; 4.23)            |
| Male                                                                           | 3                       | -1.17 (-4.86; 2.52)                  | -0.54 (-4.23; 3.16)         | -0.64 (-3.60; 2.32)           |
| Female                                                                         |                         | -2.68 (-5.52; 0.15)                  | 0.46 (-2.40; 3.31)          | -3.14 (-5.47; -0.80)          |
| Male                                                                           | 6                       | -1.27 (-5.04; 2.50)                  | -1.61 (-5.38; 2.17)         | 0.34 (-2.72; 3.40)            |
| Female                                                                         |                         | -2.66 (-5.60; 0.28)                  | -0.33 (-3.28; 2.62)         | -2.33 (-4.75; 0.09)           |
| BMI<30                                                                         | 3                       | -1.51 (-4.88; 1.86)                  | -0.82 (-4.22; 2.58)         | -0.69 (-3.33; 1.94)           |
| BMI≥30                                                                         |                         | -2.73 (-5.77; 0.32)                  | 0.97 (-2.09; 4.02)          | -3.69 (-6.27; -1.12)          |
| BMI<30                                                                         | 6                       | <b>-4.71* (-8.17; -1.25)</b>         | <b>-3.47* (-6.94; 0.01)</b> | -1.24 (-3.94; 1.45)           |
| BMI≥30                                                                         |                         | <b>-0.02 (-3.12; 3.07)</b>           | <b>1.30 (-1.80; 4.40)</b>   | -1.32 (-3.96; 1.32)           |
| WOMAC-PF < 20                                                                  | 3                       | -0.85 (-4.02; 2.32)                  | 1.50 (-1.68; 4.69)          | -2.35 (-5.04; 0.33)           |
| WOMAC-PF ≥ 20                                                                  |                         | -3.80 (-7.10; -0.49)                 | -1.48 (-4.80; 1.85)         | -2.32 (-4.91; 0.26)           |
| WOMAC-PF < 20                                                                  | 6                       | -1.93 (-5.22; 1.37)                  | -0.96 (-4.25; 2.34)         | -0.97 (-3.76; 1.81)           |
| WOMAC-PF ≥ 20                                                                  |                         | -2.61 (-6.01; 0.79)                  | -0.83 (-4.25; 2.59)         | -1.78 (-4.48; 0.91)           |
| Surgical knee flexion ≤120                                                     | 3                       | -0.61 (-4.27; 3.05)                  | 2.22 (-1.29; 5.74)          | -2.83 (-5.97; 0.30)           |
| Surgical knee flexion >120                                                     |                         | -3.12 (-6.01; -0.22)                 | -1.34 (-4.31; 1.63)         | -1.77 (-4.06; 0.51)           |
| Surgical knee flexion ≤120                                                     | 6                       | <b>1.34* (-2.35; 5.02)</b>           | <b>2.39* (-1.20; 5.98)</b>  | -1.05 (-4.21; 2.10)           |
| Surgical knee flexion >120                                                     |                         | <b>-4.17 (-7.11; -1.24)</b>          | <b>-2.95 (-5.93; 0.03)</b>  | -1.22 (-3.55; 1.10)           |
| Surgical knee extension <0 degree                                              | 3                       | -1.49 (-4.21; 1.22)                  | 0.32 (-2.41; 3.05)          | -1.81 (-4.22; 0.59)           |
| Surgical knee extension ≥0 degree                                              |                         | -2.44 (-6.64; 1.77)                  | 0.25 (-3.97; 4.47)          | -2.69 (-5.53; 0.16)           |
| Surgical knee extension <0 degree                                              | 6                       | -2.88 (-5.69; -0.07)                 | -1.73 (-4.54; 1.08)         | -1.15 (-3.65; 1.35)           |
| Surgical knee extension ≥0 degree                                              |                         | 0.12 (-4.24; 4.48)                   | 1.68 (-2.69; 6.04)          | -1.56 (-4.49; 1.38)           |
| Non-surgical knee flexion≤120                                                  | 3                       | -0.86 (-6.24; 4.52)                  | 3.06 (-2.24; 8.36)          | -3.92 (-8.01; 0.17)           |
| Non-surgical knee flexion>120                                                  |                         | -3.29 (-8.57; 1.99)                  | -0.51 (-5.68; 4.66)         | -2.78 (-6.82; 1.25)           |
| Non-surgical knee flexion ≤120                                                 | 6                       | -1.83 (-4.34; 0.68)                  | 0.20 (-2.35; 2.74)          | -2.03 (-4.11; 0.06)           |
| Non-surgical knee flexion>120                                                  |                         | -2.40 (-4.97; 0.17)                  | -1.82 (-4.41; 0.77)         | -0.58 (-2.72; 1.56)           |
| Non-surgical knee extension <0 degrees                                         | 3                       | -0.02 (-3.36; 3.31)                  | 2.34 (-1.02; 5.70)          | -2.36 (-5.32; 0.59)           |
| Non-surgical knee extension ≥0 degrees                                         |                         | -3.24 (-6.19; -0.29)                 | -1.13 (-4.09; 1.82)         | -2.11 (-4.36; 0.15)           |



|                                        |   |                              |                               |                              |
|----------------------------------------|---|------------------------------|-------------------------------|------------------------------|
| Non-surgical knee extension <0 degrees | 6 | -1.45 (-5.02; 2.11)          | -0.30 (-3.88; 3.27)           | -1.15 (-4.31; 2.02)          |
| Non-surgical knee extension ≥0 degrees |   | -2.53 (-5.64; 0.58)          | -1.07 (-4.18; 2.04)           | -1.46 (-3.86; 0.93)          |
| No anxiety or depression <sup>b</sup>  | 3 | -2.39 (-5.04; 0.26)          | <b>-1.94** (-4.54; 0.66)</b>  | <b>-0.45** (-2.66; 1.77)</b> |
| Anxiety and/or depression              |   | -1.18 (-5.11; 2.75)          | <b>4.84 (0.74; 8.93)</b>      | <b>-6.01 (-9.02; -3.00)</b>  |
| No anxiety or depression               | 6 | -2.69 (-5.44; 0.05)          | <b>-2.78** (-5.45; -0.11)</b> | <b>0.09* (-2.19; 2.37)</b>   |
| Anxiety and/or depression              |   | -0.96 (-4.92; 3.01)          | <b>3.89 (-0.28; 8.07)</b>     | <b>-4.85 (-8.01; -1.69)</b>  |
| Low fear of movement <sup>c</sup>      | 3 | -1.34 (-4.52; 1.84)          | 1.82 (-1.29; 4.93)            | -3.16 (-5.86; -0.46)         |
| High fear of movement                  |   | -3.37 (-6.58; -0.17)         | -1.91 (-5.19; 1.38)           | -1.47 (-3.97; 1.03)          |
| Low fear of movement                   | 6 | -1.96 (-5.21; 1.29)          | -0.62 (-3.81; 2.58)           | -1.34 (-4.08; 1.40)          |
| High fear of movement                  |   | -2.64 (-5.93; 0.64)          | -1.19 (-4.53; 2.15)           | -1.45 (-4.05; 1.14)          |
| Low pain self-efficacy <sup>d</sup>    | 3 | -0.93 (-4.16; 2.31)          | 1.67 (-1.61; 4.94)            | -2.59 (-5.25; 0.06)          |
| High pain self-efficacy                |   | -3.13 (-6.26; -0.01)         | -1.24 (-4.36; 1.89)           | -1.90 (-4.43; 0.64)          |
| Low pain self-efficacy                 | 6 | -3.86 (-7.16; -0.56)         | -0.98 (-4.30; 2.34)           | -2.87 (-5.62; -0.13)         |
| High pain self-efficacy                |   | -0.46 (-3.65; 2.74)          | -0.53 (-3.73; 2.66)           | 0.08 (-2.50; 2.66)           |
| Low function self-efficacy             | 3 | <b>-4.04* (-7.12; -0.96)</b> | -0.21 (-3.26; 2.84)           | -3.83 (-6.45; -1.21)         |
| High function self-efficacy            |   | <b>0.43 (-2.76; 3.62)</b>    | 0.93 (-2.32; 4.17)            | -0.50 (-2.98; 1.99)          |
| Low function self-efficacy             | 6 | -2.12 (-5.27; 1.03)          | 0.12 (-2.95; 3.19)            | -2.24 (-4.93; 0.45)          |
| High function self-efficacy            |   | -1.39 (-4.63; 1.86)          | -1.50 (-4.82; 1.83)           | 0.11 (-2.42; 2.64)           |
| Low symptom self-efficacy              | 3 | 0.11 (-3.18; 3.41)           | <b>3.16* (-0.12; 6.44)</b>    | -3.05 (-5.72; -0.38)         |
| High symptom self-efficacy             |   | -3.88 (-6.89; -0.87)         | <b>-2.57 (-5.62; 0.48)</b>    | -1.31 (-3.78; 1.17)          |
| Low symptom self-efficacy              | 6 | -2.18 (-5.59; 1.24)          | 0.83 (-2.52; 4.19)            | -3.01 (-5.81; -0.21)         |
| High symptom self-efficacy             |   | -2.07 (-5.18; 1.04)          | -2.36 (-5.53; 0.80)           | 0.29 (-2.26; 2.85)           |

Abbreviation: WOMAC-PF, Western Ontario and McMaster Universities Osteoarthritis Index Physical-function Scale.

<sup>a</sup> Time points 3 and 6 correspond to 3 and 6 months follow-ups.

<sup>b</sup> Anxiety assessed by Beck Anxiety Index (anxiety defined by values ≥ 8). Depressive symptom assessed by the Center for Epidemiologic Studies Short Depression Scale (depression defined by values ≥ 10). Due to low prevalence, individuals were classified as having either anxiety, depression, or both.

<sup>c</sup> Fear of movement measured by the Tampa Scale for Kinesiophobia (medians were used as cut-offs).<sup>66</sup>

<sup>d</sup> Self-efficacy measured by the Arthritis Self Efficacy Scale (medians were used as cut-offs).<sup>33</sup>

\* p-values < 0.05 for the subgroup-treatment effect interaction.

\*\* p-values < 0.01 for the subgroup-treatment effect interaction.

Bold values denote mean difference and 95% CI for significant subgroup-treatment effect interaction.
